# Supplementary material for: Probiotic and Oxytocin Combination Therapy in Patients with Autism Spectrum Disorder: A Randomized, Double-Blinded, Placebo-Controlled Pilot Trial
Source: MDPI journal article supplement (doi:10.3390/nu13051552), 2021-05-05
Supplement: s1 [file s1]

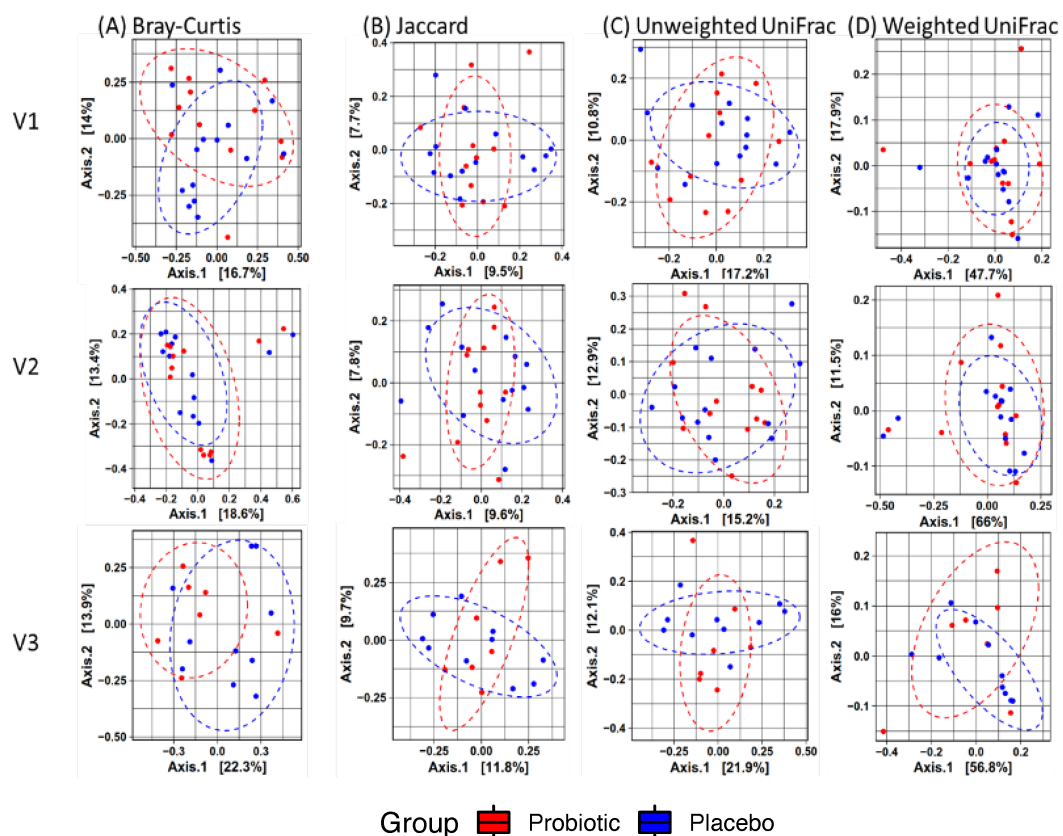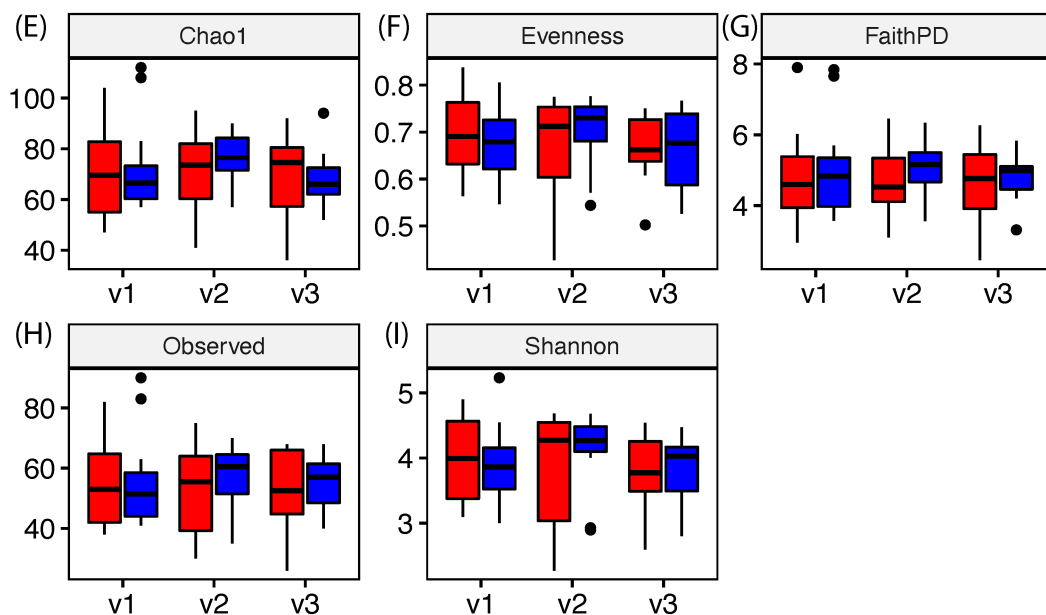

**Supplementary Figure 2.** Overview of gut microbiome species diversity. (A-D) PCoA of gut microbiome  $\beta$ -diversity metrics over the treatment course. (E-I) boxplots of  $\alpha$ -diversity metrics per study visit.
