# Supplementary material for: Probiotic and Oxytocin Combination Therapy in Patients with Autism Spectrum Disorder: A Randomized, Double-Blinded, Placebo-Controlled Pilot Trial
Source: MDPI journal article supplement (doi:10.3390/nu13051552), 2021-05-05
Supplement: s1 [file s1]

**Table S1.** Summary of identified key hub taxa based on SparCC network analysis.

| Taxa                        | Probiotic (Hub Score) |                   |                            | Placebo (Hub Score) |    |             |
|-----------------------------|-----------------------|-------------------|----------------------------|---------------------|----|-------------|
|                             | V1                    | V2<br>(Probiotic) | V3<br>(Probiotic +<br>OXT) | V1                  | V2 | V3<br>(OXT) |
| <i>Roseburia</i>            | -                     | + (0.9)           | -                          | -                   | -  | -           |
| <i>Streptococcus</i>        | -                     | + (0.9)           | -                          | -                   | -  | -           |
| <i>Veillonella</i>          | -                     | + (0.8)           | -                          | -                   | -  | -           |
| <i>Coprococcus 2</i>        | -                     | -                 | -                          | -                   | -  | + (1)       |
| Rikenellaceae               | -                     | -                 | -                          | -                   | -  | + (1)       |
| RC9 gut group               | -                     | -                 | -                          | -                   | -  | + (0.9)     |
| <i>Bilophila</i>            | -                     | -                 | -                          | -                   | -  | + (0.9)     |
| <i>Catenibacterium</i>      | -                     | -                 | -                          | -                   | -  | + (0.8)     |
| <i>Holdemanella</i>         | -                     | -                 | -                          | -                   | -  | -           |
| <i>Blautia</i>              | -                     | -                 | + (0.8)                    | -                   | -  | -           |
| <i>Barnesiella</i>          | -                     | -                 | + (0.8)                    | -                   | -  | -           |
| Christensenel-<br>laceae R7 | -                     | -                 | + (1)                      | -                   | -  | -           |
| Lachnospiraceae             | -                     | -                 | + (0.8)                    | -                   | -  | -           |
| UCG-001                     | -                     | -                 | + (1)                      | -                   | -  | -           |
| Ruminococcaceae             | -                     | -                 | -                          | -                   | -  | -           |
| UCG-002                     | -                     | -                 | -                          | -                   | -  | -           |

“+” marks that a taxon of interest (hub score>0.8) is found within the top 10 hub taxa at the given study visit and experimental group; “-” marks not found. The provided value is the hub score (the cut off score is 0.8).
