# Supplementary material for: Probiotic and Oxytocin Combination Therapy in Patients with Autism Spectrum Disorder: A Randomized, Double-Blinded, Placebo-Controlled Pilot Trial
Source: MDPI journal article supplement (doi:10.3390/nu13051552), 2021-05-05
Supplement: s1 [file s1]

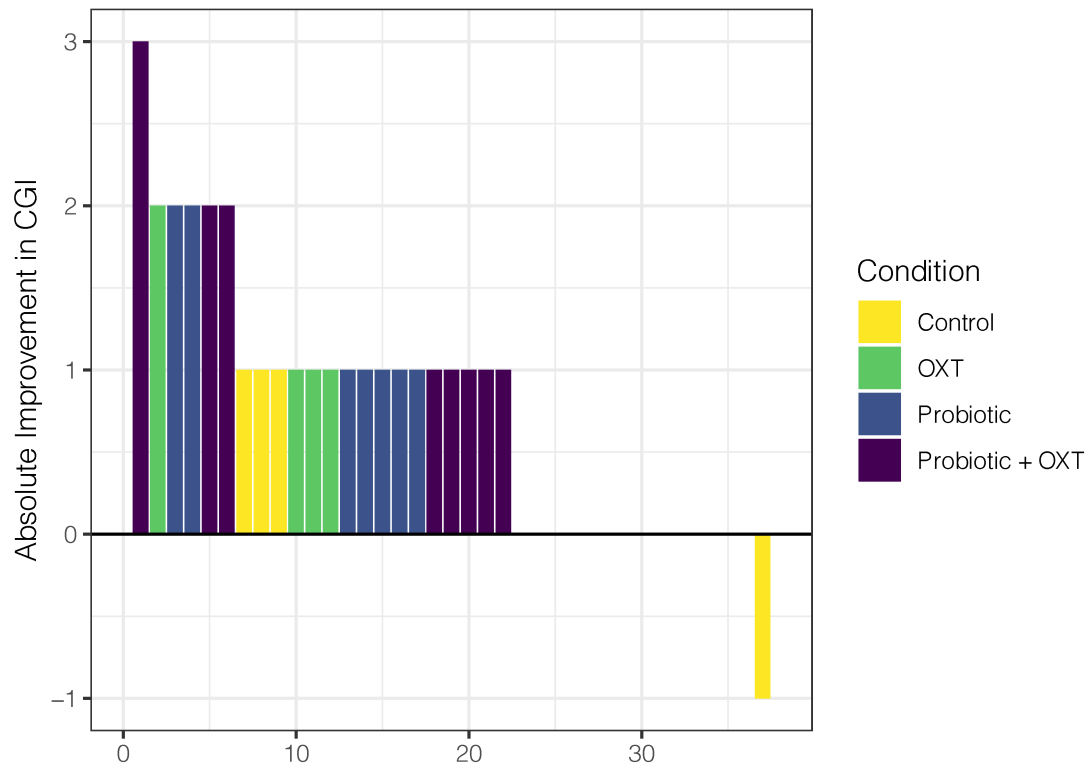

**Supplementary Figure 1.** Waterfall plot of reduction in CGI-S score for each subject in different intervention groups. Absolute improvement in CGI refers to the normalized scores of CGI-I (i.e.,  $\text{normalized CGI-I} = -(\text{CGI-I} - 4)$ ).
